# Supplementary material for: Novel BN porous-hollow nanorods: synthesis, tunable dimensions, property and formation mechanism
Source: Royal Society of Chemistry journal article supplement (doi:10.1039/c3ta12447a), 2013-01-01
Supplement: c3ta12447a.pdf [file c3ta12447a.pdf]

## Supplementary Information

### Novel BN porous-hollow nanorods: synthesis, tunable dimensions, properties and formation mechanism

Xiao Zhang, Gang Lian\*, Haibin Si, Jun Wang, Shilong Jiao, Deliang Cui\*, Qilong Wang

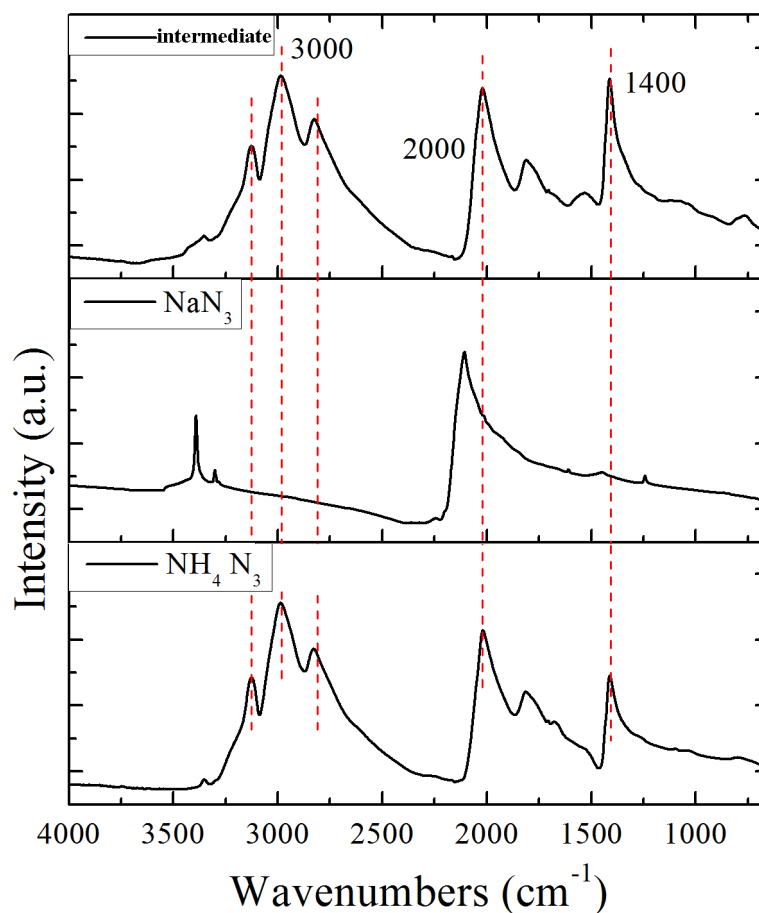

**Figure S1** The FTIR spectra of synthesized  $\text{NH}_4\text{N}_3$  following the reference<sup>[S1]</sup>,  $\text{NaN}_3$  and intermediate obtained on the wall of the teflon tube when reaction temperature being 190 °C. At lower temperature, the  $\text{NH}_4\text{BF}_4$  and  $\text{NaN}_3$  firstly reacted with each other to form  $\text{NH}_4\text{N}_3$  and  $\text{NaBF}_4$ . Because the synthesis rate of BN at lower temperature was very slow. So, the formed gaseous  $\text{NH}_4\text{N}_3$  would easily diffuse to the liquid medium and crystallize on the wall of teflon tube in the cooling process. However, the other intermediate of  $\text{NaBF}_4$  was on the bottom of tube. The self-separation phenomenon of this two intermediates also help us investigate the composition.

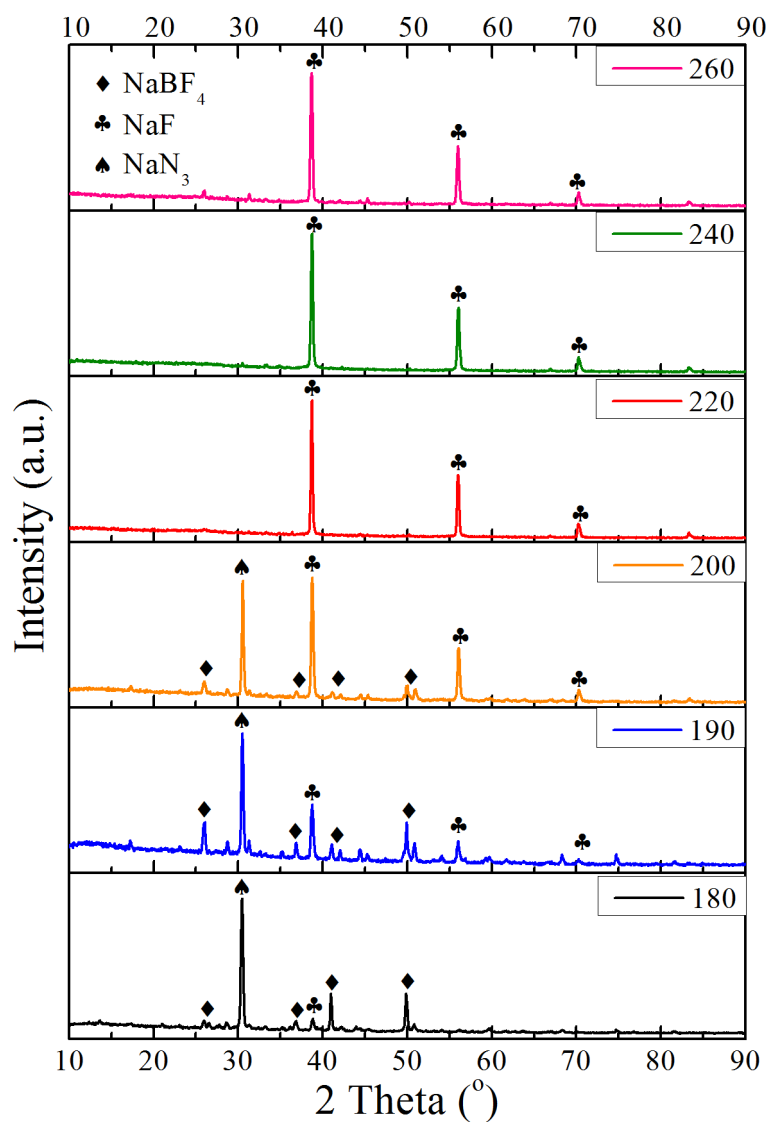

**Figure S2** The XRD patterns of untreated solid powders after reaction at 180~260 °C collected on the bottom of teflon tube. It is shown that when reaction temperature was lower than 200 °C, the intermediate of  $\text{NaBF}_4$  firstly generated. Then it would decompose into  $\text{NaF}$  when reacting with  $\text{NH}_4\text{N}_3$  to form BN.

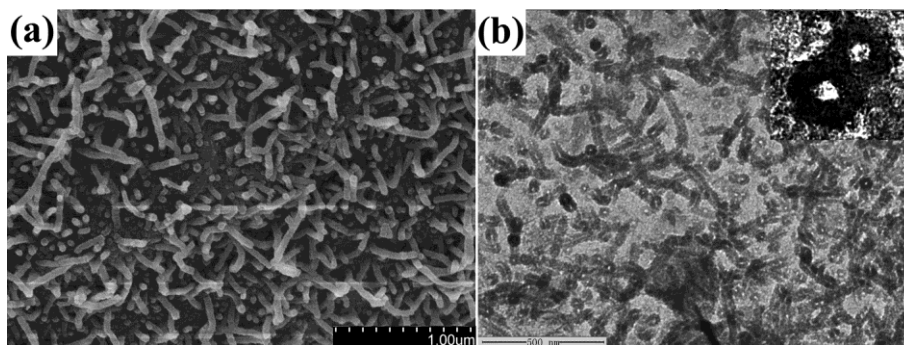

**Figure S3** (a) TEM and (b) SEM images of BN porous-hollow nanorods obtained at 280 °C & 150 MPa for 6 h. The insert is high magnification TEM image of nanorod heads. Obvious hollow structure has formed at shorter time.

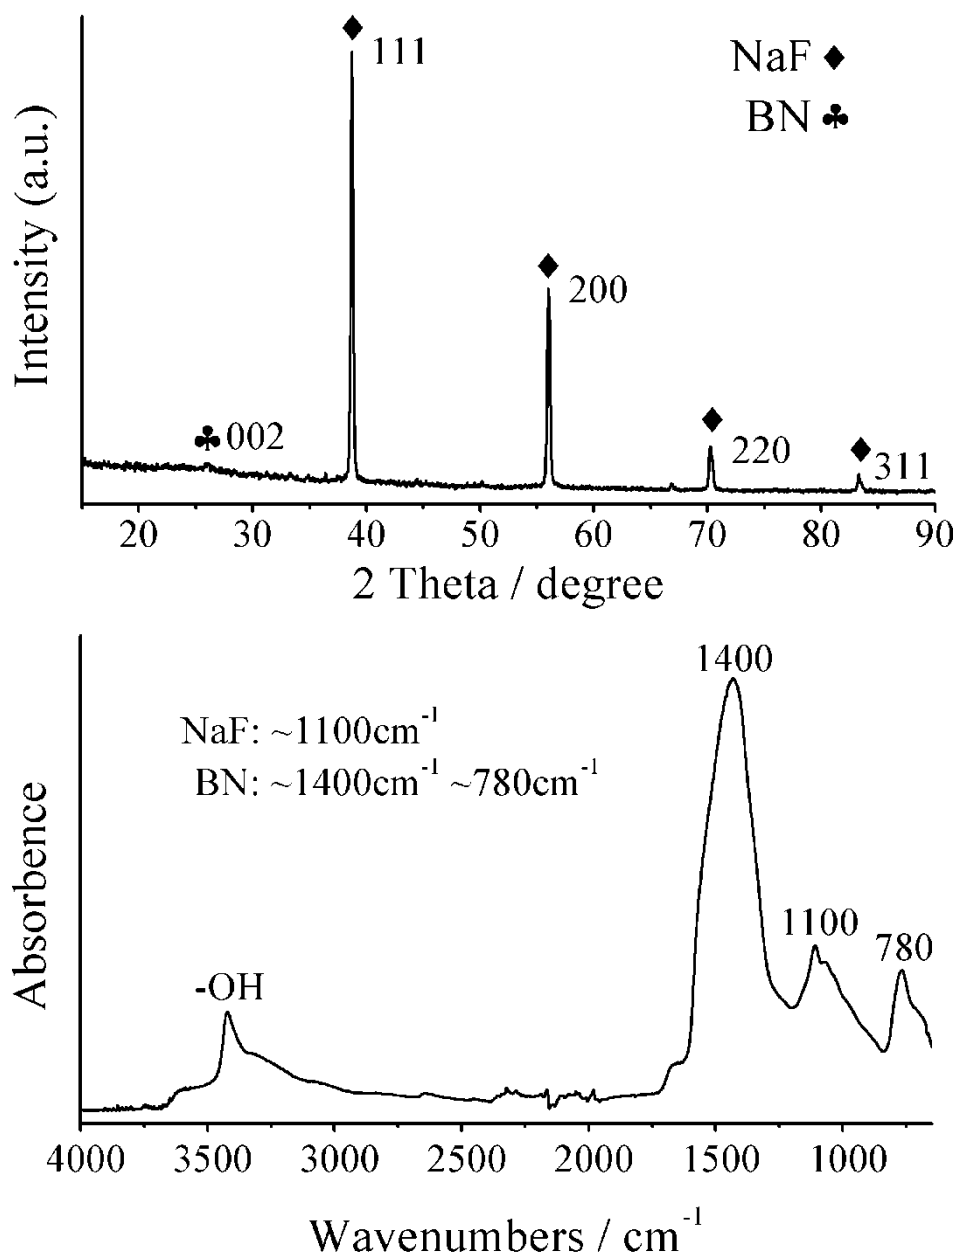

Figure S4 (a) XRD pattern and FTIR spectrum of untreated product after reaction.

#### Supporting Information References

S1. B.L. Evans, A.D. Yoffe, P. Gray, Chem. Rev., 1959, 59, 515.
